# Supplementary material for: K+-regulated vanadium oxide heterostructure enables high-performance aqueous zinc-ion batteries
Source: Royal Society of Chemistry journal article supplement (doi:10.1039/d4ce00955j), 2024-12-06
Supplement: d4ce00955j1.pdf [file d4ce00955j1.pdf]

Electronic Supplementary Material (ESI) for CrystEngComm.  
This journal is © The Royal Society of Chemistry

## Supporting information

# K<sup>+</sup> regulated vanadium oxide heterostructure enables high-performance aqueous Zinc-ion battery

*Haibing Li*<sup>a\*</sup>, *Liyun Zhu*<sup>a</sup>, *Weijun Fan*<sup>a</sup>, *Yi Xiao*<sup>b</sup>, *Jiadong Wu*<sup>c</sup>, *Hongyu Mi*<sup>d</sup>, *Fumin Zhang*<sup>e</sup>, *Linyu Yang*<sup>c\*</sup>

<sup>a</sup> College of Modern Science and Technology, China Jiliang University, Jinhua 322000, PR China. E-mail: lihaibing18@mails.ucas.ac.cn;

<sup>b</sup> Division of International Cooperation, Science&Technology Department of Xinjiang Uygur Autonomous Region, Urumqi 830011, P.R. China.

<sup>c</sup> School of physics and technology, Xin Jiang University, Urumqi, Xinjiang 830046, China. E-mail: yanglinyu0222@sina.com.cn;

<sup>d</sup> School of Chemical Engineering and Technology, Xinjiang University, Urumqi 830046, China.

<sup>e</sup> State Key Laboratory of Precision Measurement Technology and Instruments, Tianjin University, Tianjin 300072, P.R. China.

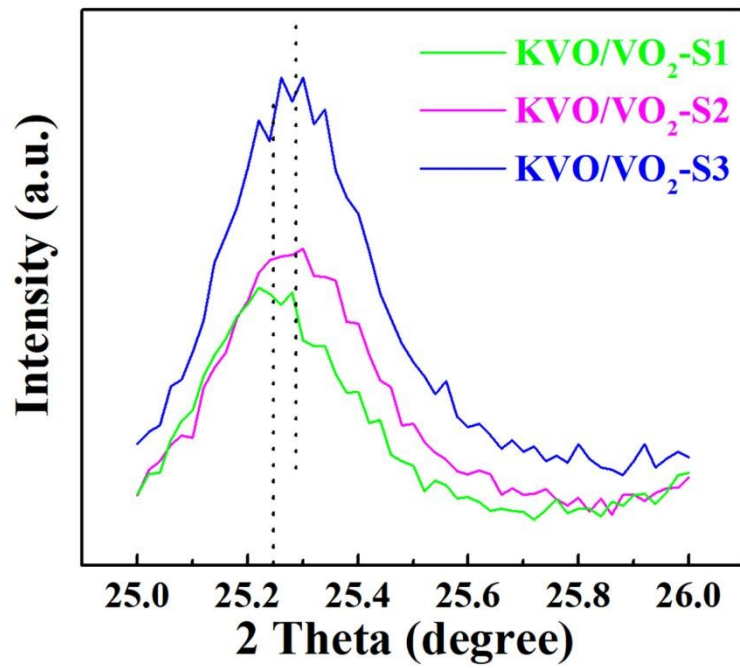

Fig. S1 Shifts of the diffraction peak of KVO/VO<sub>2</sub>-S1, KVO/VO<sub>2</sub>-S2 and KVO/VO<sub>2</sub>-S3.

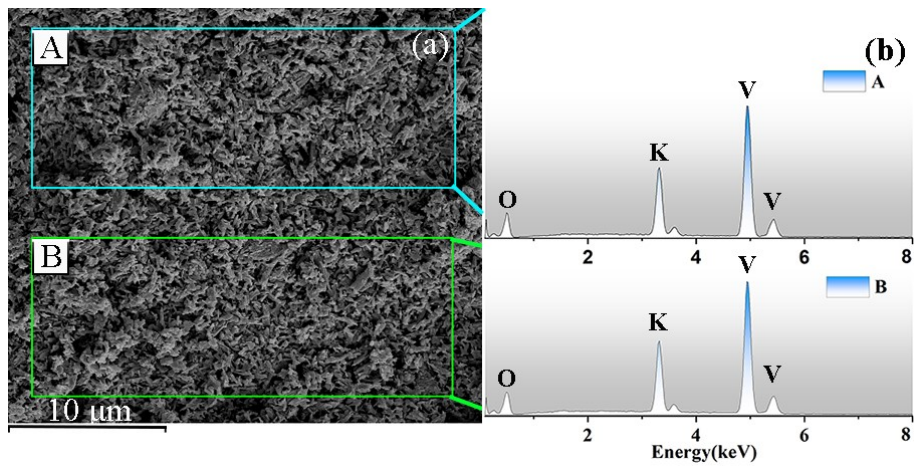

Fig. S2 SEM images and corresponding EDS spectra of KVO/VO<sub>2</sub>-S2.

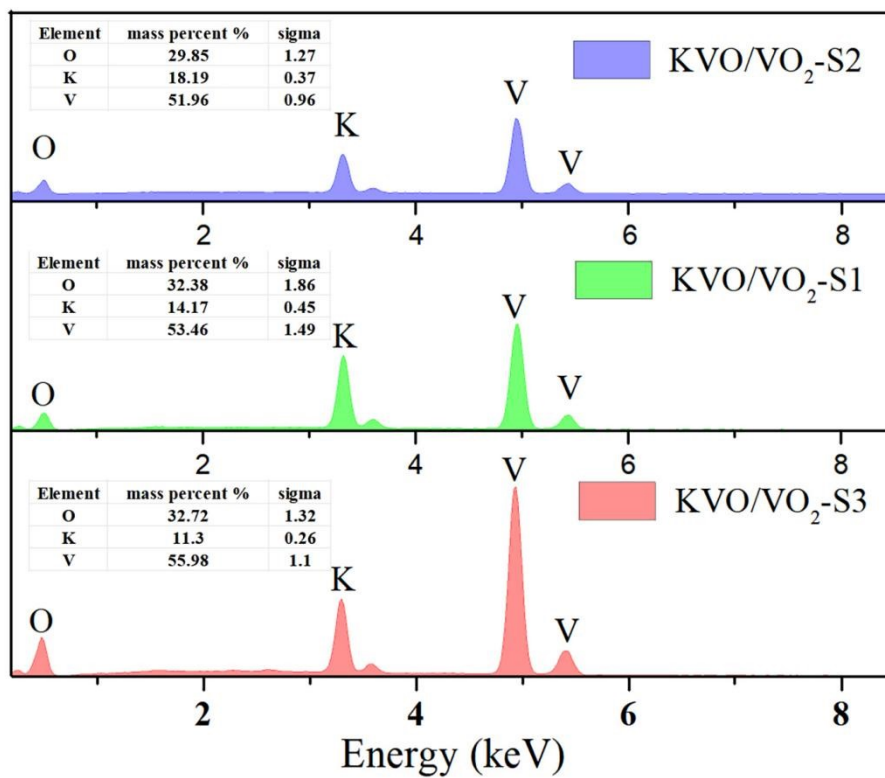

Fig. S3 EDS of the KVO/VO<sub>2</sub>-S1, KVO/VO<sub>2</sub>-S2 and KVO/VO<sub>2</sub>-S3, respectively.

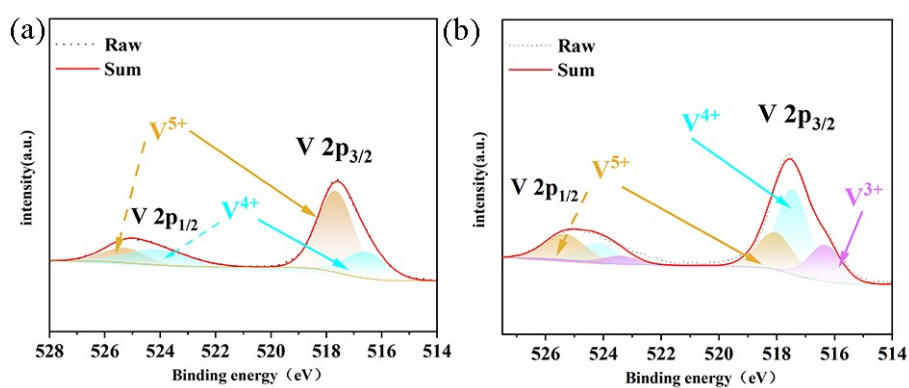

Fig. S4 High-resolution V 2p spectra of the KVO/VO<sub>2</sub>-S1 and KVO/VO<sub>2</sub>-S3 sample, respectively.

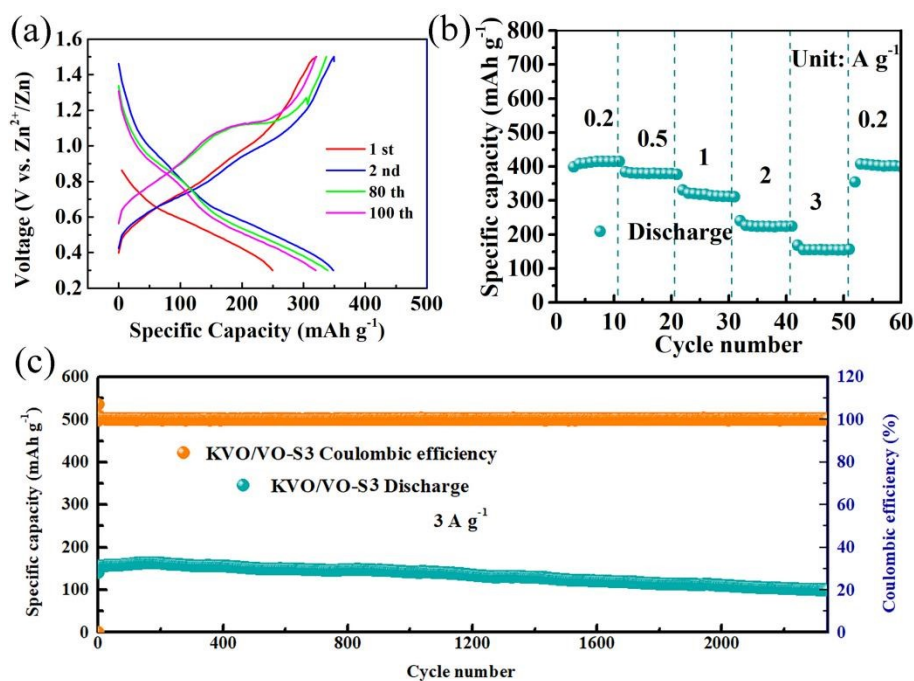

**Fig. S5** (a) GCD profiles at current density of  $0.2 A g^{-1}$ , (b) rate performance at different current density of 0.2, 0.5, 1, 2, 3  $A g^{-1}$ , (c) long cyclic performance of KVO/VO<sub>2</sub>-S3 at a current density of 3  $A g^{-1}$ .

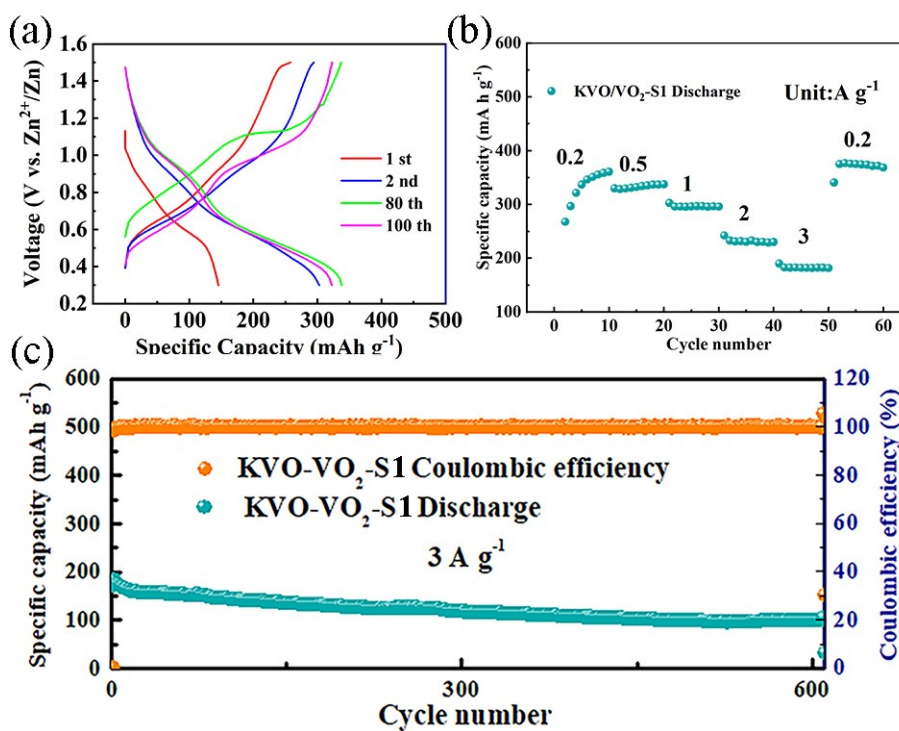

**Fig. S6** (a) GCD profiles at current density of  $0.2 A g^{-1}$ , (b) rate performance at different current density of 0.2, 0.5, 1, 2, 3  $A g^{-1}$ , (c) long cyclic performance of KVO/VO<sub>2</sub>-S1 at a current density of 3  $A g^{-1}$ .

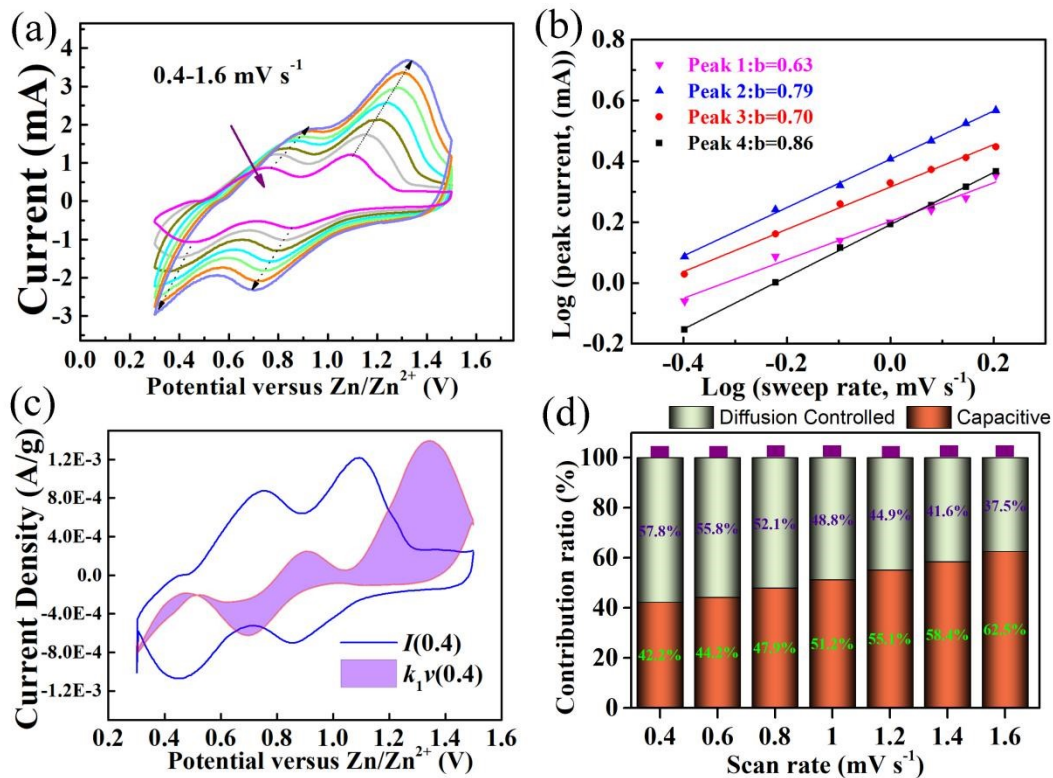

**Fig. S7** (a) CV curves under different scan rate from 0.4-1.6  $\text{mV s}^{-1}$ . (b) calculated b value by  $\log(i)$  vs  $\log(v)$  plot at special peak currents. (c) CV curve with the pseudocapacitive ratio presented by the shaded area at scan rate of 0.4  $\text{mV s}^{-1}$ . (d) percents of surface-controlled capacities and diffusion-controlled capacities at a scan rate from 0.4 to 1.6  $\text{mV s}^{-1}$  of KVO/VO<sub>2</sub>-S3 cathode.

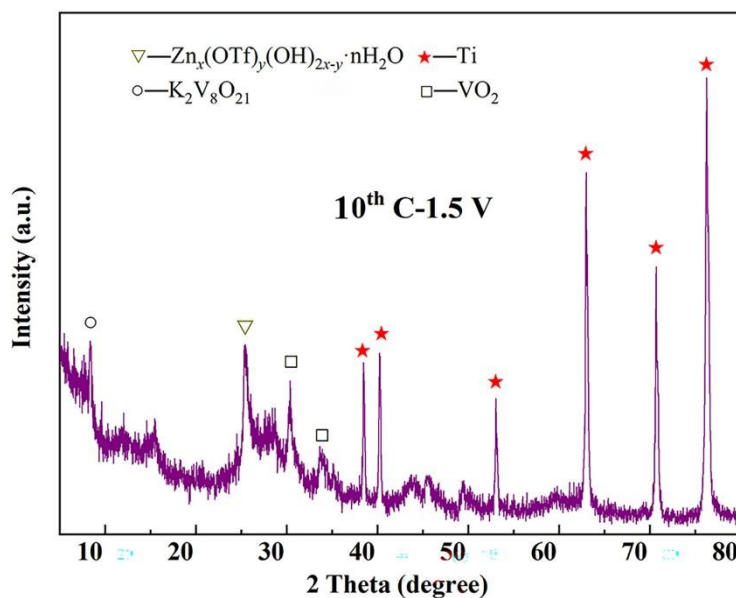

**Fig. S8** The ex-situ XRD pattern of KVO/VO<sub>2</sub>-S2 cathode at different charge/discharge states (pristine and 50<sup>th</sup> C-1.5V).

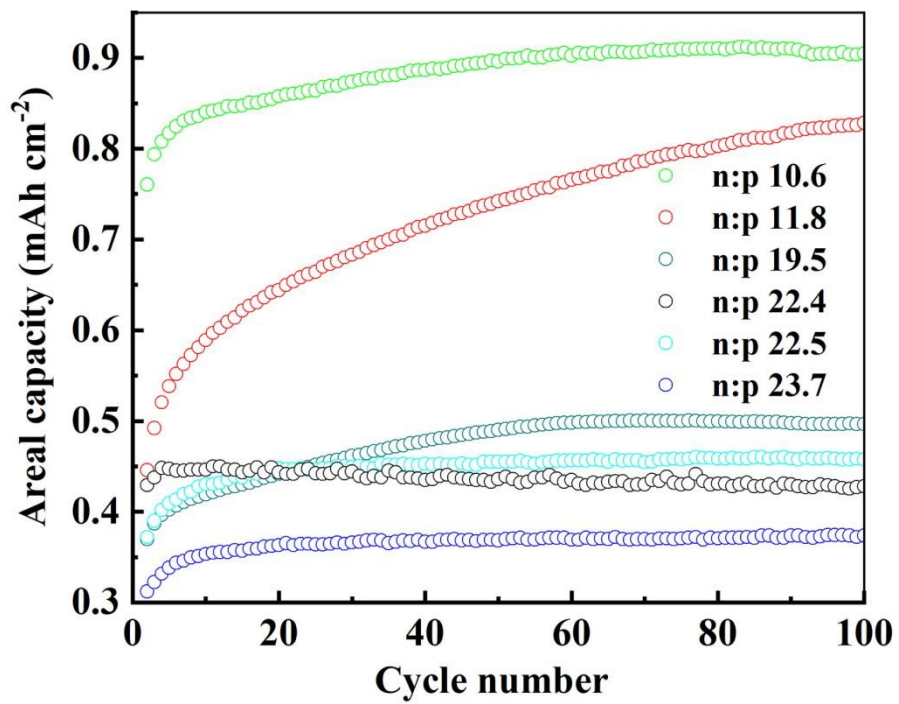

**Fig. S9** Cyclic performance of KVO/VO<sub>2</sub>-S2 cathode at different n/p ratios and areal current density.

**Table S1.** Performance of comparison.

| Materials                                                                                                                                                 | Current density(A g <sup>-1</sup> ) | Special capacity(mAh g <sup>-1</sup> ) | Current density(A g <sup>-1</sup> )/cycle number | Capacity retention |
|-----------------------------------------------------------------------------------------------------------------------------------------------------------|-------------------------------------|----------------------------------------|--------------------------------------------------|--------------------|
| V <sub>2</sub> O <sub>5</sub> <sup>18</sup>                                                                                                               | 0.2                                 | 403                                    | 1/1000                                           | 70.4%              |
| K <sub>2</sub> V <sub>3</sub> O <sub>8</sub> nanoflower <sup>40</sup>                                                                                     | 0.1                                 | 302.8                                  | 4.0/2000                                         | 92.3               |
| V <sub>2</sub> O <sub>5</sub> /V <sub>2</sub> C heterostructure <sup>34</sup>                                                                             | 1.0                                 | 412.0                                  | 20/6000                                          | 53.2               |
| V <sub>2</sub> O <sub>5</sub> /VO <sub>2</sub> heterostructure <sup>41</sup>                                                                              | 0.2                                 | 453.6                                  | 1.0/800                                          | 85.6               |
| Mn <sub>x</sub> V <sub>2</sub> O <sub>6</sub> +V <sub>2</sub> C heterostructure <sup>36</sup>                                                             | 0.1                                 | 437.0                                  | 2.0/1000                                         | 72%                |
| Mn <sub>2</sub> V <sub>2</sub> O <sub>7</sub> +V <sub>2</sub> O <sub>3</sub> <sup>42</sup>                                                                | 0.5                                 | 312.0                                  | 1.0/1000                                         | 87%                |
| MnO <sub>2</sub> +PVP <sup>43</sup>                                                                                                                       | 0.125                               | 317.2                                  | 10/20000                                         | 100%               |
| ZnNi <sub>0.5</sub> MnO/NCNTs <sup>44</sup>                                                                                                               | 0.1                                 | 239.2                                  | 1.0/3000                                         | 45%                |
| NaV <sub>3</sub> O <sub>8</sub> ·1.5H <sub>2</sub> O <sup>45</sup>                                                                                        | 0.1                                 | 334.4                                  | 1.0/3000                                         | 87%                |
| Zn <sub>0.52</sub> V <sub>2</sub> O <sub>5</sub> <sup>46</sup>                                                                                            | 0.2                                 | 286.2                                  | 20/18000                                         | 95.4%              |
| PEO-LiV <sub>3</sub> O <sub>8</sub> superlattice nanosheets <sup>47</sup>                                                                                 | 0.1                                 | 438.1                                  | 10/3000                                          | 89.8%              |
| Ca <sub>0.67</sub> V <sub>8</sub> O <sub>20</sub> ·3.5H <sub>2</sub> O nanobelts <sup>48</sup>                                                            | 0.1                                 | 466.0                                  | 5/2000                                           | 74%                |
| F-doped NH <sub>4</sub> V <sub>4</sub> O <sub>10</sub> <sup>27</sup>                                                                                      | 0.1                                 | 465.0                                  | 4/2000                                           | 88%                |
| Zn <sub>3</sub> (OH) <sub>2</sub> V <sub>2</sub> O <sub>7</sub> ·2H <sub>2</sub> O/NH <sub>4</sub> V <sub>4</sub> O <sub>10</sub> nanobelts <sup>49</sup> | 0.5                                 | 337.0                                  | 10/4000                                          | 94%                |
| Mg <sub>2</sub> VO <sub>4</sub> /VO <sub>2</sub> heterostructures <sup>50</sup>                                                                           | 0.3                                 | 393.6                                  | 0.3/1000                                         | 83.6%              |
| δ-K <sub>0.49</sub> V <sub>2</sub> O <sub>5</sub> nanobelts <sup>51</sup>                                                                                 | 0.2                                 | 361.0                                  | 5/2000                                           | 90.3%              |
| Our work                                                                                                                                                  | 0.2                                 | 460.6                                  | 3/2500                                           | 90.7%              |

**Table S2.** Performance of comparison of batteries with different n/p ratios.

| Sample                             | Mass loading<br>(mg cm <sup>-2</sup> ) | n/p<br>ratio | Areal current density<br>(mA cm <sup>-2</sup> ) | Areal capacity<br>(mAh cm <sup>-2</sup> ) |
|------------------------------------|----------------------------------------|--------------|-------------------------------------------------|-------------------------------------------|
| KVO/VO <sub>2</sub> -S2<br>cathode | 2.33                                   | 19.5         | 7.0                                             | 0.5                                       |
|                                    | 4.13                                   | 11.8         | 12.4                                            | 0.8                                       |
|                                    | 6.40                                   | 10.6         | 19.2                                            | 0.9                                       |
|                                    | 7.50                                   | 23.7         | 22.5                                            | 0.4                                       |
|                                    | 8.32                                   | 22.4         | 25.0                                            | 0.4                                       |
|                                    | 9.51                                   | 22.5         | 28.5                                            | 0.4                                       |
